# Supplementary material for: Generation of Antibody-Producing Hybridomas Following One Single Immunization with a Targeted DNA Vaccine
Source: PubMed Central journal article supplement (PMC3417379; doi:10.1111/j.1365-3083.2011.02639.x), 2012-04
Supplement: sji0075-0379-SD2.pdf [file sji0075-0379-SD2.pdf]

Supplemental, Figure 1.

```

mCherry  MVSKGEEDNMAIIKEFMRFKVHMEGVSNGHEFEIEGEGEGRPYEGTQTAK 50
YFP      MVSKGEE----LFTGVVPILVELDGDVNGHKFSVSGEGEGDATYGKLTLLK 46
EGFP     MVSKGEE----LFTGVVPILVELDGDVNGHKFSVSGEGEGDATYGKLTLLK 46
          *****      ::  .: : *.:*:*****:*.:.***** . * . * *

mCherry  LKVTKGGPLPFAWDILSPQFMYGSKAYVKHPADIP--DYLKLSFPEGFKW 98
YFP      FICTTG-KLPVPWPTLVTTFGYGLQCFARYPDHMKQHDFFKSAMPEGYVQ 95
EGFP     FICTTG-KLPVPWPTLVTTLYGVQCFSRYPDHMKQHDFFKSAMPEGYVQ 95
          :  .* * **..* * . : ** ..: :.* .. : *:* :*:***:

mCherry  ERVMNFEDGGVVTVTQDSSLQDGEFIYKVKLRGTFNFPDGPVQMOKKTMGW 148
YFP      ERTIFFKDDGNYKTRAEVKFEEDTLVNRIELKGIIDFKEDGNILGHK-LEY 144
EGFP     ERTIFFKDDGNYKTRAEVKFEEDTLVNRIELKGIIDFKEDGNILGHK-LEY 144
          **.: *:*.* .. : ..... : :*:.* :* .* : : * : :

mCherry  EASSERMYPEDGALKGEIKQRLKLD-----GGHYDAEVKTTYKAKKPV 192
YFP      NYNSHNVYIMADKQKNGIKVNFKIRHNIEDGSVQLADHYQQNTPIGDGPV 194
EGFP     NYNSHNVYIMADKQKNGIKVNFKIRHNIEDGSVQLADHYQQNTPIGDGPV 194
          : .*.:* . * . ** .:*.:. * :.* .. **

mCherry  QLPGAYNVNIKLDITS-HNEDYTIVEQYERAEGRHSTGGMDELYK 236
YFP      LLPDNHYLSYQSALS KDPNEKRDHMLLEFVTAAGITLGMDELYK 239
EGFP     LLPDNHYLSTQSALS KDPNEKRDHMLLEFVTAAGITLGMDELYK 239
          ** . : . : : .: . ** . : * . . * *****

```

**Supplementary Figure 1. Sequence alignments of mCherry, EGFP, and YFP.** The alignment was performed by ClustalW. The asterisks indicate identical residues; two vertical dots highly conserved residues; and single dots indicate lesser conserved residues.

Supplemental, Figure 2.

```

mCherry      MVSKGEEDNMAIIKEFMRFKVHMEGVSNGHEFEIEGEGEGRPYEGTQTAK 50
mOrange      MVSKGEENNMAIIKEFMRFKVMEGVSNGHEFEIEGEGEGRPYEGFQTAK 50
mPlum        MVSKGEE----VIKEFMRFKVMEGVSNGHEFEIEGEGEGRPYEGTQTAK 46
mRFP         MAS-SED----VIKEFMRFKVMEGVSNGHEFEIEGEGEGRPYEGTQTAK 45
tdTomato     MVSKGEE----VIKEFMRFKVMEGSMNGHEFEIEGEGEGRPYEGTQTAK 46
              *.* .*:      :*****:****:*****  *****
              .

mCherry      LKVTKGGPLPFAWDILSPQFMYGSKAYVKHPADIPDYKLSFPEGFKWER 100
mOrange      LKVTKGGPLPFAWDILSPQFTYGSKAYVKHPADIPDYKLSFPEGFKWER 100
mPlum        LKVTKGGPLPFAWDILSPQCMYGSKGYVKHPADIPDYKLSFPEGFKWER 96
mRFP         LKVTKGGPLPFAWDILSPQFYGSKAYVKHPADIPDYKLSFPEGFKWER 95
tdTomato     LKVTKGGPLPFAWDILSPQFMYGSKAYVKHPADIPDYKLSFPEGFKWER 96
              *****  ***** .*****  *****

mCherry      VMNFEDGGVVTVTQDSSLQDGEFIYKVKLRGTNFPDGPVMQKKTMGWEA 150
mOrange      VMNFEDGGVVTVTQDSSLQDGEFIYKVKLRGTNFPDGPVMQKKTMGWEA 150
mPlum        VMNFEDGGVVTVTQDSSLQDGEFIYKVKLRGTNFPDGPVMQKKTMGWEA 146
mRFP         VMNFEDGGVVTVTQDSSLQDGEFIYKVKLRGTNFPDGPVMQKKTMGWEA 145
tdTomato     VMNFEDGGLVTVTQDSSLQDGTLLIYKVKMRGTNFPDGPVMQKKTMGWEA 146
              *****:*****  :*****:***** .*****

mCherry      SSERMYPEDGALKGEIKQRLKLDGGHYDAEVKTTYKAKKPVQLPGAYNV 200
mOrange      SSERMYPEDGALKGEIKMRLKLDGGHYTSEVKTTYKAKKPVQLPGAYIV 200
mPlum        SSERMYPEDGALKGEMKRLKLDGGHYDAEVKTTYMAKKPVQLPGAYKT 196
mRFP         STERMYPEDGALKGEIKMRLKLDGGHYDAEVKTTYMAKKPVQLPGAYKT 195
tdTomato     STERLYPRDGVKGEIHQALKLDGGHYLVEFKTIYMAKKPVQLPGYYYV 196
              *:***:*.**.*.***:  :*****  *.* * ***** * .

mCherry      NIKLDITSHNEDYTIVEQYERAEGRH-----STGG----- 230
mOrange      GIKLDITSHNEDYTIVEQYERAEGRH-----STGG----- 230
mPlum        DIKLDITSHNEDYTIVEQYERAEGRH-----STGA----- 226
mRFP         DIKLDITSHNEDYTIVEQYERAEGRH-----STGA----- 225
tdTomato     DTKLDITSHNEDYTIVEQYERSEGRHHLFLGHGTGSTGSGSSGTASSEDN 246
              . *****:*****  ***.

mCherry      ----MDELYK 236
mOrange      ----MDELYK 236
mPlum        -----LYK 229
mRFP         -----
tdTomato     NMAV----- 250

```

**Supplementary Figure 2. Sequence alignments of dsRed-derived FPs.** The alignment was performed by ClustalW. The asterisks indicate identical residues; two vertical dots highly conserved residues; and single dots indicate lesser conserved residues.
